# Supplementary material for: Layered 2D alkyldiammonium lead iodide perovskites: synthesis, characterization, and use in solar cells
Source: Royal Society of Chemistry journal article supplement (doi:10.1039/c6ta05055g), 2016-01-01
Supplement: c6ta05055g1.pdf [file c6ta05055g1.pdf]

Supplementary Information for

## **Layered 2D Alkyldiammonium Lead Iodide Perovskites: Synthesis, Characterization, and Use in Solar Cells**

Majid Safdari<sup>a</sup>, Per H. Svensson<sup>a,c</sup>, Minh Tam Hoang<sup>b</sup>, Ilwhan Oh<sup>b</sup>, Lars Kloo<sup>a</sup> and James M. Gardner<sup>a</sup>

<sup>a</sup> Division of Applied Physical Chemistry, Department of Chemistry, KTH Royal Institute of Technology, SE-100 44, Stockholm, Sweden.

<sup>b</sup> Department of Applied Chemistry, Kumoh National Institute of Technology, Gumi, Gyeongbuk, Korea

<sup>c</sup> SP Process Development, Forskargatan, 15121 Södertälje, Sweden

Table S1. Bond length and angles in the  $\text{BdPbI}_4$ ,  $\text{HdPbI}_4$  and  $\text{OdPbI}_4$  compared with  $\text{MAPbI}_3$ 

|                                                     | $\text{BdPbI}_4$                                   | $\text{HdPbI}_4$        | $\text{OdPbI}_4$        | $\text{MAPbI}_3$ |
|-----------------------------------------------------|----------------------------------------------------|-------------------------|-------------------------|------------------|
| Distance between<br>2Pb in 2 different<br>planes(Å) | 10.383                                             | 11.845 Å                | 13.737Å                 | 6.284            |
| Distance between<br>2Pb in the same<br>planes(Å)    | 6.101                                              | 6.190                   | 6.138                   | 6.284            |
| Pb-I bonds in the<br>plane(Å)                       | 3.205<br>3.183<br>3.170<br>3.211<br>3.181<br>3.186 | 3.220<br>3.213<br>3.180 | 3.202<br>3.187<br>3.192 | 3.142            |
| Pb-I-Pb                                             | 149.87                                             | 148.31                  | 147.44                  | 180              |

Table S2. Atomic parameters for  $\text{Odl}_4$  obtained from single crystallography characterization.

| Atom | Ox. | Wyck. | Site | S.O.F. | x/a        | y/b        | z/c        | U [Å <sup>2</sup> ] |
|------|-----|-------|------|--------|------------|------------|------------|---------------------|
| Pb1  |     | 2d    | -1   |        | 1/2        | 1/2        | 1.00000    |                     |
| I1   |     | 4e    | 1    |        | 0.45589(4) | 0.19045(5) | 0.78278(5) |                     |
| I2   |     | 4e    | 1    |        | 0.26297(4) | 0.57228(6) | 0.87052(6) |                     |
| C3   |     | 4e    | 1    |        | 0.0564(7)  | 0.3823(12) | 0.1964(10) |                     |
| H3A  |     | 4e    | 1    |        | 0.00910    | 0.42310    | 0.24930    | 0.0800              |
| H3B  |     | 4e    | 1    |        | 0.06330    | 0.26780    | 0.21480    | 0.0800              |
| C4   |     | 4e    | 1    |        | 0.0133(7)  | 0.4130(12) | 0.0215(9)  |                     |
| H4A  |     | 4e    | 1    |        | 0.06270    | 0.37760    | -0.02980   | 0.0750              |
| H4B  |     | 4e    | 1    |        | -0.04730   | 0.34830    | -0.01770   | 0.0750              |
| N1   |     | 4e    | 1    |        | 0.2989(5)  | 0.5135(7)  | 0.4936(8)  |                     |
| H1A  |     | 4e    | 1    |        | 0.34480    | 0.47050    | 0.45300    | 0.0760              |
| H1B  |     | 4e    | 1    |        | 0.31950    | 0.50290    | 0.59620    | 0.0760              |
| H1C  |     | 4e    | 1    |        | 0.29160    | 0.61710    | 0.46920    | 0.0760              |
| C1   |     | 4e    | 1    |        | 0.2004(7)  | 0.4306(12) | 0.4311(10) |                     |
| H1D  |     | 4e    | 1    |        | 0.20960    | 0.31620    | 0.44870    | 0.0840              |
| H1E  |     | 4e    | 1    |        | 0.15260    | 0.46810    | 0.48460    | 0.0840              |
| C2   |     | 4e    | 1    |        | 0.1594(7)  | 0.4620(12) | 0.2634(10) |                     |
| H2A  |     | 4e    | 1    |        | 0.20670    | 0.42200    | 0.21020    | 0.0770              |
| H2B  |     | 4e    | 1    |        | 0.15260    | 0.57680    | 0.24610    | 0.0770              |

Table S3. Atomic parameters for  $\text{HdPbI}_4$  obtained from single crystallography characterization.

| Atom | Ox. | Wyck. | Site | S.O.F. | x/a        | y/b         | z/c        | U [ $\text{\AA}^2$ ] |
|------|-----|-------|------|--------|------------|-------------|------------|----------------------|
| Pb1  |     | 2a    | -1   |        | 1.00000    | 0           | 1.00000    |                      |
| I2   |     | 4e    | 1    |        | 0.95026(3) | 0.19209(4)  | 0.67949(4) |                      |
| I1   |     | 4e    | 1    |        | 0.72611(3) | -0.08058(5) | 0.92281(5) |                      |
| C1   |     | 4e    | 1    |        | 0.5385(6)  | -0.0187(7)  | 0.4494(8)  |                      |
| H1A  |     | 4e    | 1    |        | 0.49070    | -0.06920    | 0.35530    | 0.0390               |
| H1B  |     | 4e    | 1    |        | 0.59930    | -0.09320    | 0.50300    | 0.0390               |
| N1   |     | 4e    | 1    |        | 0.7605(6)  | -0.0106(6)  | 0.3332(10) |                      |
| H1C  |     | 4e    | 1    |        | 0.81620    | 0.03200     | 0.41190    | 0.0650               |
| H1D  |     | 4e    | 1    |        | 0.78980    | -0.02750    | 0.25430    | 0.0650               |
| H1E  |     | 4e    | 1    |        | 0.73690    | -0.10210    | 0.36310    | 0.0650               |
| C2   |     | 4e    | 1    |        | 0.5977(6)  | 0.1275(7)   | 0.4063(8)  |                      |
| H2A  |     | 4e    | 1    |        | 0.53830    | 0.20950     | 0.37130    | 0.0450               |
| H2B  |     | 4e    | 1    |        | 0.65620    | 0.16640     | 0.49860    | 0.0450               |
| C3   |     | 4e    | 1    |        | 0.6570(6)  | 0.1003(8)   | 0.2832(8)  |                      |
| H3A  |     | 4e    | 1    |        | 0.68400    | 0.20100     | 0.25460    | 0.0520               |
| H3B  |     | 4e    | 1    |        | 0.59960    | 0.05720     | 0.19210    | 0.0520               |

Table S4. Atomic parameters for  $\text{BdPbI}_4$  obtained from single crystallography characterization.

| Atom | Ox. | Wyck. | Site | S.O.F. | x/a         | y/b          | z/c         | U [ $\text{\AA}^2$ ] |
|------|-----|-------|------|--------|-------------|--------------|-------------|----------------------|
| Pb1  |     | 1a    | 1    |        | 0.55166(13) | 0.51679(9)   | 0.99283(8)  |                      |
| I6   |     | 1a    | 1    |        | 0.76845(18) | 0.22772(14)  | 0.93489(11) |                      |
| I5   |     | 1a    | 1    |        | 0.48344(18) | 0.40280(14)  | 1.29928(11) |                      |
| I1   |     | 1a    | 1    |        | 0.33467(19) | 0.80439(13)  | 1.05101(11) |                      |
| I4   |     | 1a    | 1    |        | 0.62009(19) | 0.63023(14)  | 0.68668(11) |                      |
| Pb2  |     | 1a    | 1    |        | 1.05214(13) | 0.01639(9)   | 0.99273(8)  |                      |
| I3   |     | 1a    | 1    |        | 0.21718(17) | 0.30601(13)  | 1.04819(11) |                      |
| I2   |     | 1a    | 1    |        | 0.88576(17) | 0.72680(13)  | 0.93925(11) |                      |
| I8   |     | 1a    | 1    |        | 0.83791(18) | -0.09556(14) | 1.29750(11) |                      |
| I7   |     | 1a    | 1    |        | 1.26589(18) | 0.12735(15)  | 0.68910(11) |                      |
| C3   |     | 1a    | 1    |        | 0.794(4)    | 0.2382(17)   | 0.5541(19)  |                      |
| H3A  |     | 1a    | 1    |        | 0.68890     | 0.24450      | 0.53780     | 0.0750               |
| H3B  |     | 1a    | 1    |        | 0.78930     | 0.30210      | 0.61490     | 0.0750               |
| C6   |     | 1a    | 1    |        | 0.299(2)    | 0.793(2)     | 0.4429(16)  |                      |
| H6A  |     | 1a    | 1    |        | 0.31980     | 0.73290      | 0.37720     | 0.0560               |
| H6B  |     | 1a    | 1    |        | 0.38770     | 0.77710      | 0.47950     | 0.0560               |
| C5   |     | 1a    | 1    |        | 0.303(3)    | 0.964(2)     | 0.3790(16)  |                      |
| H5A  |     | 1a    | 1    |        | 0.20410     | 0.98280      | 0.35420     | 0.0540               |
| H5B  |     | 1a    | 1    |        | 0.29960     | 1.02590      | 0.44100     | 0.0540               |
| C7   |     | 1a    | 1    |        | 0.1332(18)  | 0.738(2)     | 0.5483(17)  |                      |
| H7A  |     | 1a    | 1    |        | 0.04350     | 0.75560      | 0.51290     | 0.0510               |
| H7B  |     | 1a    | 1    |        | 0.11360     | 0.79410      | 0.61640     | 0.0510               |
| C2   |     | 1a    | 1    |        | 0.928(5)    | 0.3003(19)   | 0.4349(18)  |                      |
| H2A  |     | 1a    | 1    |        | 0.90940     | 0.24950      | 0.37220     | 0.1360               |
| H2B  |     | 1a    | 1    |        | 1.02810     | 0.25910      | 0.44890     | 0.1360               |
| C4   |     | 1a    | 1    |        | 0.809(3)    | 0.066(2)     | 0.6199(19)  |                      |
| H4A  |     | 1a    | 1    |        | 0.82320     | 0.00200      | 0.55780     | 0.0640               |
| H4B  |     | 1a    | 1    |        | 0.90750     | 0.05980      | 0.64570     | 0.0640               |
| C8   |     | 1a    | 1    |        | 0.135(3)    | 0.5622(18)   | 0.6060(16)  |                      |
| H8A  |     | 1a    | 1    |        | 0.02010     | 0.51510      | 0.64570     | 0.0500               |
| H8B  |     | 1a    | 1    |        | 0.19580     | 0.51260      | 0.53630     | 0.0500               |
| C1   |     | 1a    | 1    |        | 0.983(5)    | 0.475(2)     | 0.358(2)    |                      |
| H1A  |     | 1a    | 1    |        | 0.94670     | 0.54220      | 0.41840     | 0.0920               |
| H1B  |     | 1a    | 1    |        | 1.10480     | 0.48910      | 0.31760     | 0.0920               |
| N2   |     | 1a    | 1    |        | 0.656(3)    | 0.008(2)     | 0.7365(13)  |                      |
| H2C  |     | 1a    | 1    |        | 0.65620     | 0.05190      | 0.80060     | 0.0850               |
| H2D  |     | 1a    | 1    |        | 0.65400     | -0.09460     | 0.76310     | 0.0850               |
| H2E  |     | 1a    | 1    |        | 0.56480     | 0.03290      | 0.71600     | 0.0850               |
| N3   |     | 1a    | 1    |        | 0.449(2)    | 1.0093(16)   | 0.2677(17)  |                      |
| H3C  |     | 1a    | 1    |        | 0.53050     | 1.04260      | 0.29040     | 0.0730               |
| H3D  |     | 1a    | 1    |        | 0.42770     | 1.08570      | 0.20940     | 0.0730               |

|     |    |   |          |            |            |        |
|-----|----|---|----------|------------|------------|--------|
| H3E | 1a | 1 | 0.48090  | 0.92840    | 0.23260    | 0.0730 |
| N4  | 1a | 1 | 0.211(3) | 0.538(2)   | 0.699(2)   |        |
| H4C | 1a | 1 | 0.21730  | 0.62670    | 0.72330    | 0.0930 |
| H4D | 1a | 1 | 0.31400  | 0.50830    | 0.66560    | 0.0930 |
| H4E | 1a | 1 | 0.14990  | 0.46510    | 0.76890    | 0.0930 |
| N1  | 1a | 1 | 0.905(2) | 0.5168(17) | 0.2552(12) |        |
| H1C | 1a | 1 | 0.96780  | 0.48590    | 0.18420    | 0.0630 |
| H1D | 1a | 1 | 0.89960  | 0.61950    | 0.23450    | 0.0630 |
| H1E | 1a | 1 | 0.80170  | 0.47000    | 0.28560    | 0.0630 |

Table S5. Mean value and standard deviation (STDEV) of short-circuit current density, open-circuit voltage, fill factor, and power conversion efficiency for 5 solar cells fabricated with BdAPbI<sub>4</sub> absorber.

|               | Eff (%)     | Voc (V)    | Jsc (mAcm <sup>-2</sup> ) | FF          |
|---------------|-------------|------------|---------------------------|-------------|
| 1             | 1.082       | 0.87       | 2.894                     | 0.43        |
| 2             | 1.016       | 0.82       | 2.753                     | 0.45        |
| 3             | 0.936       | 0.88       | 2.801                     | 0.38        |
| 4             | 0.974       | 0.85       | 2.592                     | 0.442       |
| 5             | 0.845       | 0.78       | 2.702                     | 0.401       |
| Average±STDEV | 0.971±0.089 | 0.84±0.041 | 2.75±0.112                | 0.421±0.029 |

Table S6. Mean value and standard deviation (STDEV) of short-circuit current density, open-circuit voltage, fill factor, and power conversion efficiency for 5 solar cells fabricated with HdAPbI<sub>4</sub> absorber.

|               | Eff (%)     | Voc (V)     | Jsc (mAcm <sup>-2</sup> ) | FF          |
|---------------|-------------|-------------|---------------------------|-------------|
| 1             | 0.592       | 0.725       | 1.735                     | 0.471       |
| 2             | 0.532       | 0.715       | 1.65                      | 0.451       |
| 3             | 0.536       | 0.702       | 1.55                      | 0.493       |
| 4             | 0.445       | 0.602       | 1.45                      | 0.51        |
| 5             | 0.383       | 0.552       | 1.506                     | 0.461       |
| Average±STDEV | 0.497±0.083 | 0.659±0.077 | 1.578±0.114               | 0.477±0.024 |

Table S7. Mean value and standard deviation (STDEV) of short-circuit current density, open-circuit voltage, fill factor, and power conversion efficiency for 5 solar cells fabricated with OdAPbI<sub>4</sub> absorber.

|               | Eff (%)       | Voc (V)     | Jsc (mAcm <sup>-2</sup> ) | FF          |
|---------------|---------------|-------------|---------------------------|-------------|
| 1             | 0.012         | 0.732       | 0.047                     | 0.340       |
| 2             | 0.007         | 0.720       | 0.031                     | 0.302       |
| 3             | 0.008         | 0.652       | 0.035                     | 0.37        |
| 4             | 0.006         | 0.551       | 0.029                     | 0.407       |
| 5             | 0.003         | 0.593       | 0.016                     | 0.287       |
| Average±STDEV | 0.0072±0.0032 | 0.649±0.078 | 0.031±0.011               | 0.341±0.049 |

Table S8. Mean value and standard deviation (STDEV) of short-circuit current density, open-circuit voltage, fill factor, and power conversion efficiency for 5 solar cells fabricated with MAPbI<sub>3</sub> light absorber.

|               | Eff (%)     | Voc (V)     | Jsc (mAcm <sup>-2</sup> ) | FF          |
|---------------|-------------|-------------|---------------------------|-------------|
| 1             | 2.117       | 0.805       | 5.858                     | 0.449       |
| 2             | 2.098       | 0.81        | 5.607                     | 0.462       |
| 3             | 1.900       | 0.760       | 5.816                     | 0.430       |
| 4             | 2.049       | 0.723       | 6.032                     | 0.470       |
| 5             | 2.091       | 0.790       | 5.504                     | 0.481       |
| Average±STDEV | 2.051±0.088 | 0.777±0.036 | 5.763±0.209               | 0.458±0.020 |

Table S9. IV characteristics data after 48 hours and 96 hours.

|                                  | Eff (%) | Voc (V) | Jsc (mAcm <sup>-2</sup> ) | FF    |
|----------------------------------|---------|---------|---------------------------|-------|
| BdAPbI <sub>4</sub> (after 48 H) | 0.866   | 0.88    | 2.425                     | 0.406 |
| BdAPbI <sub>4</sub> (after 96 H) | 0.798   | 0.85    | 2.29                      | 0.410 |
| HdAPbI <sub>4</sub> (after 48 H) | 0.454   | 0.715   | 1.405                     | 0.452 |
| HdAPbI <sub>4</sub> (after 96 H) | 0.339   | 0.69    | 1.26                      | 0.39  |
| MAPbI <sub>3</sub> (after 48 H)  | 0.37    | 0.715   | 1.208                     | 0.431 |
| MAPbI <sub>3</sub> (after 96 H)  | 0.028   | 0.69    | 0.112                     | 0.36  |

Table S10. Maximum valence band position obtained from Cyclic Voltammetry and Ultraviolet Photoelectron Spectroscopy.

|                     | VB position from CV (eV) | VB position from UPS (eV) |
|---------------------|--------------------------|---------------------------|
| BdAPbI <sub>4</sub> | -5.33                    | -5.38                     |
| HdAPbI <sub>4</sub> | -5.59                    | -5.64                     |
| OdAPbI <sub>4</sub> | -5.36                    | -5.55                     |

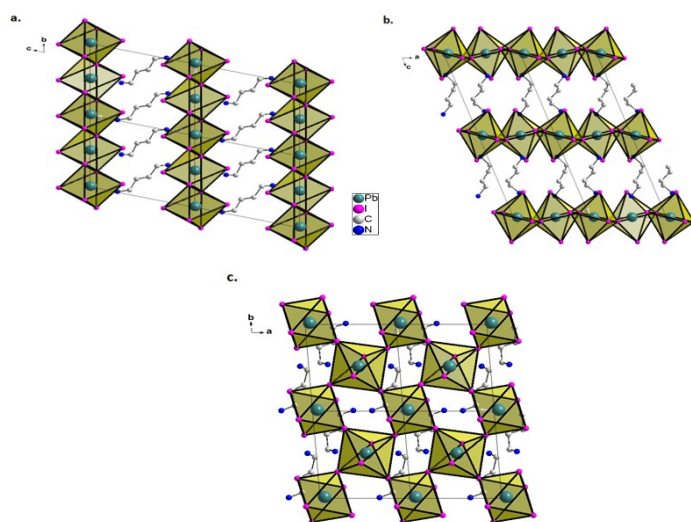

Figure S1. Structure of BdAPbI<sub>4</sub> showed in Ball and stick model in 3 different axes. Single crystals were obtained from gently decreasing temperature of a concentrated aqueous solution. Characterization was performed at room temperature.

---

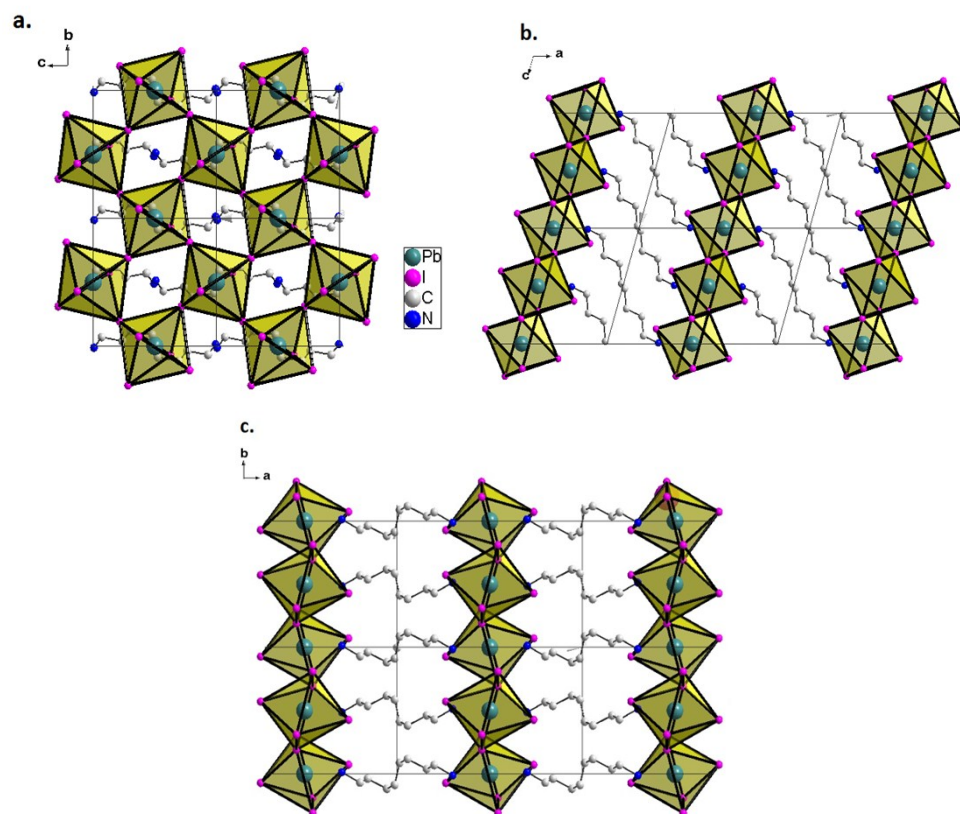

Figure S2. Structure of OdAPbI<sub>4</sub> showed in Ball and stick model in 3 different axes. Single crystals were obtained from gently decreasing temperature of a concentrated aqueous solution. Characterization was performed at room temperature.

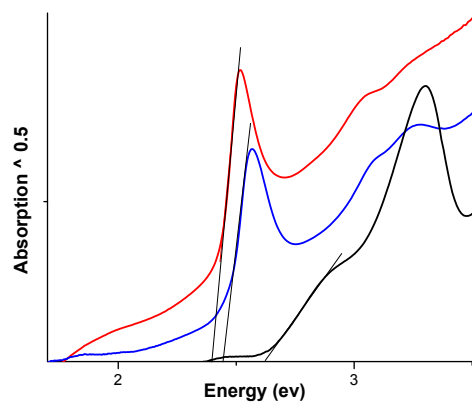

Figure S3. Tauc plots of --- BdAPbI<sub>4</sub>, --- HdAPbI<sub>4</sub>, and --- OdAPbI<sub>4</sub>



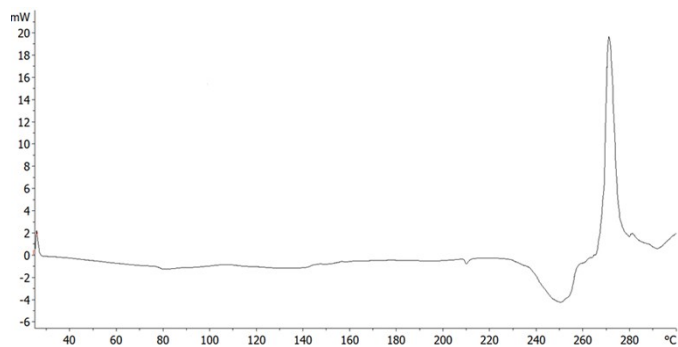

Figure S4. DSC graph of BdAPbI<sub>4</sub> .

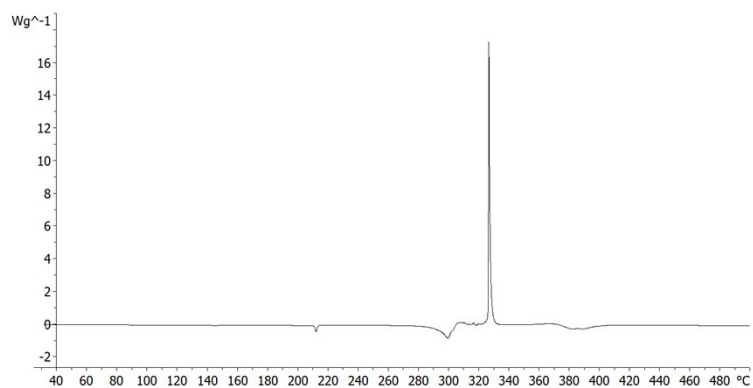

Figure S5. DSC graph of HdAPbI<sub>4</sub> .

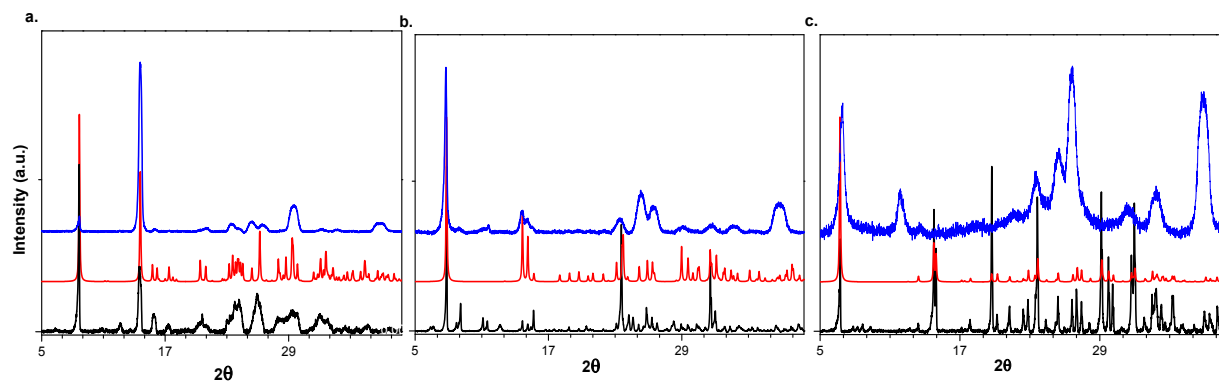

Figure S6. XRD patterns of a. BdAPbI<sub>4</sub>, b. HdAPbI<sub>4</sub> and c. OdAPbI<sub>4</sub> presented as --- powder sample, --- calculated pattern from single crystal data and --- spin coated sample on mesoporous TiO<sub>2</sub> for assembly of solar cells.

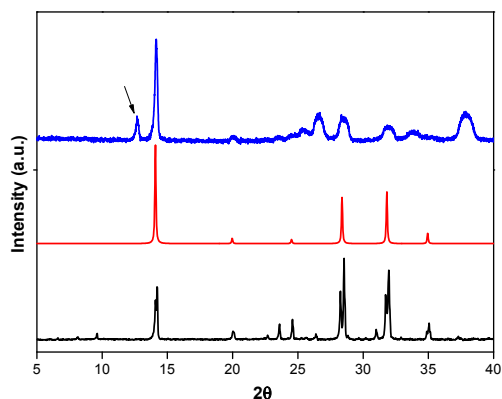

Figure S7. Comparison of MAPbI<sub>3</sub> XRD patterns, --- tetragonal phase powder sample at room temperature<sup>1</sup>, --- calculated powder pattern from cubic single crystal data<sup>1</sup>, and --- spin coated sample at ambient atmosphere on mesoporous TiO<sub>2</sub> for fabrication of solar cells. The pattern shows peaks of PbI<sub>2</sub> indicating the instability of MAPbI<sub>3</sub> at ambient atmosphere.

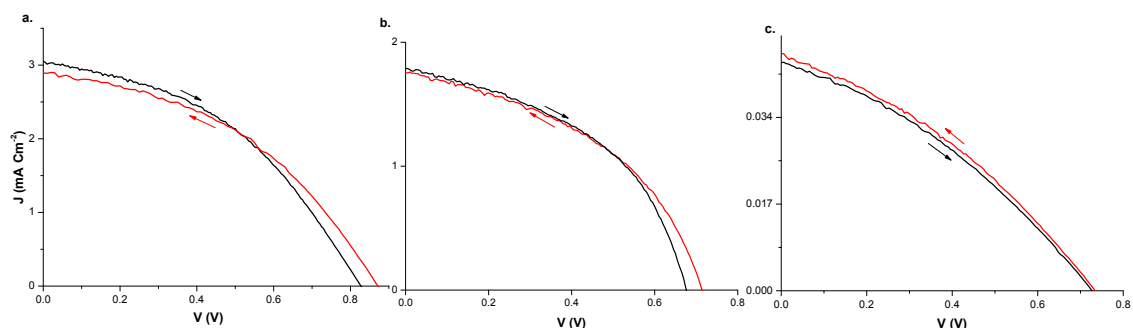

Figure S8. Forward and backward measurement for a. BdAPbI<sub>4</sub>, b. HdAPbI<sub>4</sub>, and c. OdAPbI<sub>4</sub> based solar cells indicating small hysteresis.

Table S11. IV characteristics for solar cells measured at 10mV/s scan rate. Bias voltage is scanned from Voc to 0 in the red values, and for the black ones from 0 to Voc.

|                     | J <sub>sc</sub> (mA cm <sup>-2</sup> ) | V (V) | FF    | η (%) |
|---------------------|----------------------------------------|-------|-------|-------|
| BdAPbI <sub>4</sub> | 2.894                                  | 0.870 | 0.430 | 1.082 |
|                     | 3.054                                  | 0.825 | 0.424 | 1.069 |
| HdAPbI <sub>4</sub> | 1.735                                  | 0.725 | 0.471 | 0.592 |
|                     | 1.789                                  | 0.675 | 0.459 | 0.554 |
| OdAPbI <sub>4</sub> | 0.047                                  | 0.732 | 0.34  | 0.012 |
|                     | 0.045                                  | 0.726 | 0.34  | 0.011 |

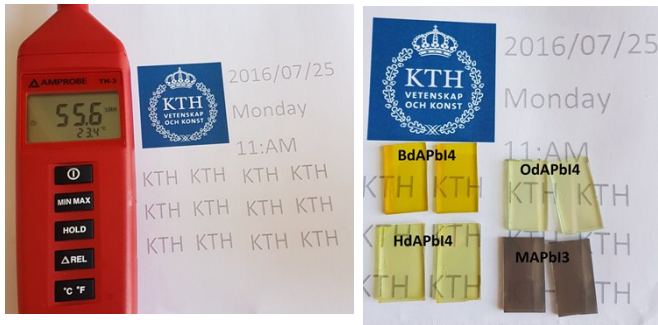

Figure S9. Representative photographs of spin coated material's film on  $\text{TiO}_2$  substrates for fabrication of solar cells and XRD characterization.

---

## References

1. Safdari, M.; Fischer, A.; Xu, B.; Kloo, L.; Gardner, J. M., Structure and function relationships in alkylammonium lead(ii) iodide solar cells. *Journal of Materials Chemistry A* 2015, 3, (17), 9201-9207.
